# Supplementary material for: Distress Levels of Parents of Children with Neurodevelopmental Disorders during the COVID-19 Pandemic: A Comparison between Italy and Australia
Source: Int J Environ Res Public Health. 2021 Oct 21;18(21):11066. doi: 10.3390/ijerph182111066 (PMC8583226; doi:10.3390/ijerph182111066)
Supplement: Supplementary file 1 [file ijerph-18-11066-s001.zip › ijerph-1378448-supplementary.pdf]

## Supplementary Materials

**Table S1.** Impacts on children and families (those who agree or strongly agree with each statement)

|                                                                                                                            | Italy |      | Australia |      |
|----------------------------------------------------------------------------------------------------------------------------|-------|------|-----------|------|
|                                                                                                                            | n     | %    | n         | %    |
| <b>General</b>                                                                                                             |       |      |           |      |
| My child's overall health and wellbeing has been impacted by the COVID-19 crisis                                           | 117   | 58.5 | 200       | 69.4 |
| COVID has worsened pre-existing health conditions for my child                                                             | 91    | 45.5 | 139       | 50   |
| COVID has had an impact on my wellbeing                                                                                    | 95    | 47.7 | 197       | 68.4 |
| COVID has had an impact on my other children's wellbeing                                                                   | 56    | 36.4 | 164       | 57.1 |
| <b>Types of support</b>                                                                                                    |       |      |           |      |
| My support networks have decreased significantly due to COVID                                                              | 97    | 53.0 | 178       | 77.4 |
| COVID has disrupted carer supports and services                                                                            | 79    | 44.9 | 127       | 71.8 |
| COVID has disrupted respite arrangements                                                                                   | 52    | 27.1 | 91        | 72.2 |
| COVID has significantly disrupted the allied health services my child accesses (e.g. occupational therapy, speech therapy) | 78    | 74.3 | 151       | 72.2 |
| COVID has significantly disrupted my child's psychological therapy                                                         | 42    | 56.0 | 114       | 68.7 |
| COVID has significantly disrupted my child's behavioural therapy                                                           | 58    | 70.7 | 97        | 74.1 |
| My child has started taking more medication than normal due to the COVID pandemic                                          | 26    | 25.2 | 232       | 97.1 |

|                                                                                                                     |     |      |     |        |
|---------------------------------------------------------------------------------------------------------------------|-----|------|-----|--------|
| My child is taking less medication than usual because of the COVID pandemic                                         | 3   | 3.1  | 236 | 98.7   |
| My child's ability to access specialists has been significantly impacted due to COVID                               | 52  | 29.2 | 148 | 70.5   |
| My ability to organize supports has been significantly impacted due to COVID (e.g. support workers)                 | 41  | 28.1 | 114 | 71.7   |
| COVID has significantly disrupted my child's other treatments and supports (e.g. physiotherapy, OT, speech therapy) | 60  | 64.5 | 150 | 81.5   |
| My child's contacts with people outside of the home have reduced since before the COVID pandemic                    | 117 | 62.2 | 228 | 95.8   |
| <b>Family health</b>                                                                                                |     |      |     |        |
| COVID has significantly disrupted my child's routines                                                               | 138 | 69.0 | 243 | 94.9   |
| During the past two weeks, COVID restrictions have been stressful for my child                                      | 93  | 47.0 | 191 | 75.5   |
| Home isolation has been stressful for me                                                                            | 119 | 60.1 | 183 | 72.335 |
| Balancing work with childcare/family responsibilities has been difficult for me due to COVID                        | 74  | 40.0 | 186 | 80.9   |
| My pre-existing mental health conditions have been worsened due to COVID                                            | 38  | 32.5 | 110 | 57.0   |
| My pre-existing physical health conditions have been worsened due to COVID                                          | 34  | 28.6 | 90  | 46.6   |
| My family is feeling worried about COVID                                                                            | 122 | 61.6 | 146 | 57.9   |
| The COVID restrictions have had significant negative effect on my life                                              | 114 | 57.6 | 130 | 51.8   |
| The amount of quality time I spend with my child has reduced since before COVID-19                                  | 14  | 7.1  | 47  | 19.0   |

|                                                                                                        |     |      |     |      |
|--------------------------------------------------------------------------------------------------------|-----|------|-----|------|
| Changes related to the Coronavirus/COVID-19 crisis have created financial problems for me or my family | 65  | 32.8 | 104 | 43.5 |
| The COVID situation has resulted in changes to the employment status of people in my household         | 96  | 48.5 | 100 | 48.8 |
| I am concerned about the stability of our living situation                                             | 52  | 26.3 | 72  | 31.3 |
| I am worried about running out of food due to a lack of money                                          | 21  | 10.6 | 34  | 14.7 |
| I am hopeful that the COVID crisis will end soon                                                       | 189 | 94.5 | 186 | 73.2 |
| I am worried about making it through future periods of isolation                                       | 122 | 61.9 | 122 | 48.2 |

### **Home based learning**

|                                                                                                       |     |      |     |      |
|-------------------------------------------------------------------------------------------------------|-----|------|-----|------|
| COVID has prevented my child from attending educational facilities in person (e.g. childcare, school) | 176 | 90.3 | 224 | 91.1 |
| COVID has disrupted my child's learning                                                               | 135 | 68.9 | 212 | 83.8 |
| My child has completed home-based learning during the COVID-19 pandemic.                              | 170 | 87.2 |     |      |
| I have adequate access to internet and online resources                                               | 163 | 84.0 | 217 | 87.2 |
| My child has adequate capacity to engage in home-based learning                                       | 93  | 47.5 | 110 | 44.4 |
| I have adequate capacity to support my child's educational needs                                      | 155 | 79.9 | 117 | 46.4 |

### **Child behaviours**

|                                                                              |     |      |     |      |
|------------------------------------------------------------------------------|-----|------|-----|------|
| My child has experienced reductions in sleep quality as a result of COVID-19 | 37  | 18.7 | 114 | 46.9 |
| My child's exercise has decreased as a result of COVID-19                    | 135 | 67.5 | 169 | 68.7 |

|                                                                                                                                             |     |      |     |      |
|---------------------------------------------------------------------------------------------------------------------------------------------|-----|------|-----|------|
| My child's diet has been poorer as a result of COVID-19                                                                                     | 22  | 11.2 | 82  | 33.7 |
| My child's ability to spend time outside has reduced as a result of COVID.                                                                  | 161 | 80.9 | 138 | 55.9 |
| My child has difficulty following the recommendations for keeping away from close contact with people                                       | 52  | 27.5 | 136 | 57.1 |
| My child has had difficulty maintaining relationships as a result of COVID                                                                  | 83  | 43.2 | 163 | 67.9 |
| My child has become easily annoyed, irritable, and angry since the COVID-19 outbreak, compared to before the outbreak                       | 120 | 60.6 | 159 | 65.2 |
| The cancellation of important events (such as holiday, birthday celebration etc.) has been difficult for my family                          | 52  | 28.0 | 159 | 63.1 |
| My child has been watching significantly more TV or digital media (e.g., Netflix, YouTube, web surfing) since before COVID                  | 144 | 73.1 | 203 | 82.2 |
| My child has been using significantly more social media (e.g., Facetime, Facebook, Instagram, Snapchat, Twitter, TikTok) since before COVID | 63  | 43.5 | 74  | 45.7 |
| My child has been playing significantly more video games since before COVID                                                                 | 101 | 58.7 | 132 | 65.4 |

---
